# 1 Gender-biased perceptions of important ecology articles

2  
3 Corey J. A. Bradshaw\*<sup>1</sup>, Franck Courchamp<sup>2</sup>

4  
5 <sup>1</sup>Global Ecology, College of Science and Engineering, Flinders University, GPO Box 2100, South  
6 Australia 5001, Australia. corey.bradshaw@flinders.edu.au

7 <sup>2</sup>Ecologie, Systématique et Evolution, Université Paris-Sud, Centre National de Recherche  
8 Scientifique, AgroParisTech, Université Paris-Saclay, 91400 Orsay, France. franck.courchamp@u-  
9 psud.fr

10  
11 \*Corresponding author, to whom correspondence and material requests should be addressed.

## 12 13 Abstract

14 Gender bias is still unfortunately rife in the sciences, and men co-author most articles (>  
15 70%) in ecology. Whether ecologists subconsciously rate the quality of their peers' work  
16 more favourably if men are the dominant co-authors is still unclear. To test this  
17 hypothesis, we examined how expert ecologists ranked important ecology articles based  
18 on a previously compiled list. Women proposed articles with a higher average proportion  
19 of women co-authors (0.18) than did men proposers (0.07). For the 100 top-ranked  
20 articles, women voters placed more emphasis on articles co-authored by women (0.06)  
21 than did men (0.02). However, women voters were still biased because they ranked men-  
22 dominated articles more highly, albeit not by as much as men did. This effect disappeared  
23 after testing read-only articles. This indicates a persistent, subconscious bias that men-  
24 dominated articles are considered to be of higher quality before actual assessment. We  
25 add that ecologists need to examine their own subconscious biases when appointing  
26 students, hiring staff, and choosing colleagues with whom to publish.

27  
28 *Key words:* gender bias, sexism, ecology, expertise, disparity, science publishing

## 29 30 Introduction

31 Despite a general reduction in gender disparities within academia over time<sup>1-3</sup>, there  
32 remains ample gender-bias across scientific disciplines. Experimental evidence shows  
33 that scientists tend to rate writings authored by men higher than those authored by  
34 women<sup>4</sup>, and that academic scientists tend to favour men applicants over women for  
35 student positions<sup>5</sup>. In the United Kingdom, there is also evidence that women academics  
36 in science, engineering, and mathematics have more administrative duties on average  
37 than men, and hence, less time to do research<sup>6</sup>. Women scientists there also have fewer  
38 opportunities for career development and training, and tend to earn lower salaries, hold  
39 fewer senior roles, and are less likely to be granted permanent positions than men<sup>6,7</sup>.

40  
41 Gender bias — in its myriad forms of expression and consequences — is also likely to  
42 vary among scientific disciplines. In ecology, despite undergraduates and young  
43 researchers having gender ratios closer to parity (as is now the case in most science  
44 disciplines<sup>8,9</sup>), senior academic positions in ecology and evolution are still dominated by  
45 men<sup>10</sup>. This means that most ecology papers are written by men; for example, in a study  
46 examining the proportion of women authorships in papers published from 1990-2011  
47 across 21 science and humanities disciplines, *ecology and evolution* had the seventh

48 lowest proportion of women authors (22.76% of 279012 total authorships)<sup>3</sup>. Women  
49 scientists are also consistently under-represented in ecology textbooks compared to  
50 baseline assumptions of no bias<sup>9</sup>.

51  
52 Scientific journals also tend to appoint more men than women on their editorial boards,  
53 and editors tend to select reviewers of the same gender as themselves (known as  
54 *homophily*)<sup>11</sup>. Ecologists are also guilty of homophily; for example, men editors selected  
55 < 25% women reviewers, but women editors consistently selected between 30 to 35%  
56 women reviewers for all papers submitted to the journal *Functional Ecology* from  
57 January 2004 to June 2014<sup>12</sup>. Yet, this is not due to the actual performance of women  
58 reviewers, because reviewer scores for that journal did not differ between men and  
59 women reviewers, and the proportion of papers rejected did not differ between women  
60 and men editors<sup>12</sup>. However, there are gender differences in *how* papers are reviewed. For  
61 example, from a much broader sample of journals in ecology and evolution, a survey of  
62 1334 ecologists and evolutionary biologists identified that women took longer to review  
63 papers than men, and women reviewed fewer manuscripts on average (a logical outcome  
64 of being asked less frequently than men to review). In seeming contradiction to the lack  
65 of a gender difference in reviewer scores for *Functional Ecology*<sup>12</sup>, men from the broader  
66 sample recommended rejection more frequently than did women<sup>13</sup>.

67  
68 Ecologists can take some heart in the observation that there is little evidence for gender  
69 bias in acceptance or citation rates of their papers. In one regional ecology journal (*New  
70 Zealand Journal of Ecology*), publication success between 2003 and 2012 was not related  
71 to the gender of the authors or that of the editor, but like *Functional Ecology*, editors  
72 selected more men reviewers<sup>14</sup>, likely because there are simply more men ecologists from  
73 which to choose reviewers. Likewise, there was no author gender bias in citation rate for  
74 5883 ecology articles published between 1997 and 2004 (from the journals *Animal  
75 Behaviour*, *Behavioral Ecology*, *Behavioral Ecology and Sociobiology*, *Biological  
76 Conservation*, *Journal of Biogeography*, *Landscape Ecology*)<sup>15</sup>. A similar conclusion was  
77 reached for 507 ecology and evolution articles from five 'leading' (but unidentified)  
78 journals<sup>10</sup>. Nor was there an overall difference in the acceptance rates of papers according  
79 to gender for 2550 ecology and evolution articles (even for single-authored papers),  
80 although this differed among journals<sup>10</sup>. However, in one journal (*Behavioral Ecology*),  
81 the number of women first-authored papers increased following the implementation of  
82 double-blind reviews<sup>16</sup>, suggesting that either women were being given harsher treatment  
83 during review, or were less likely to submit when their gender could be identified at the  
84 time of submission.

85  
86 Examining the publication output of 187 individual editorial board members of seven  
87 ecology and evolution journals, women had a lower mean *h*-index than did men (after  
88 controlling for scientific 'age')<sup>17</sup>. Given the lack of evidence for gender bias in citation  
89 rates in ecology<sup>10,14,15,18</sup>, it is thought that this was mainly a result of the lower average  
90 publication output of women ecologists<sup>17</sup>. Indeed, in a sample of 39 women and 129 men  
91 in evolutionary biology and ecology from the same approximate cohort (who held  
92 research and faculty positions in the life sciences departments of British and Australian  
93 universities), men produced almost 40% more papers than did women, and this difference

94 appeared as early as two years from initial publication<sup>19</sup>. Likewise, a sample of 182  
95 academic biologists (69 women and 113 men) with at least ten years of experience in  
96 academia indicated that women produced between 19 and 29% fewer papers after ten  
97 years of employment than did men<sup>20</sup>.

98  
99 Gender differences in publication frequency can occur for many reasons, including  
100 possibly having less time to do research<sup>6</sup>, higher demands of motherhood<sup>21-23</sup>, a lower  
101 relative tendency compared to men to seek self-promotion<sup>24-26</sup>, fewer academic grants  
102 and accolades<sup>27-29</sup>, among other reasons<sup>9,30,31</sup>. Despite no strong evidence yet for gender  
103 biases in citation rates in ecology, it is still unclear whether established ecologists — both  
104 women and men — subconsciously rate the quality of their peers' work more favourably  
105 than if men are the dominant co-authors, as has been shown for postgraduate students  
106 enrolled in communication programs<sup>4</sup>. To test this hypothesis, we have recently compiled  
107 a unique dataset to determine which ecology articles are most recommended by ecology  
108 experts<sup>32</sup>. From this list of most-recommended articles, we compiled the gender of both  
109 the proposers and voters of the articles, as well as the gender of each co-author of the  
110 articles themselves (including the gender of the lead author). Specifically, we asked  
111 whether ecologists of both genders were swayed by their learned perceptions of article  
112 'quality' outside of the review process in terms of: (i) whether men and women proposed  
113 or voted for articles more often if they had a higher proportion of men co-authors, and (ii)  
114 if there was a correlation between the proportion of women co-authors on an article and  
115 its mean rank (as measured and reported previously — see *Material and methods*<sup>32</sup>).

116

## 117 **Results**

### 118 *Editor pool*

119 The overall proportion of women among the 665 editors we originally contacted to  
120 propose articles was 22.1% (i.e., 141 women, 524 men); of these, 14 women (10.0%) and  
121 137 men (26.1%) responded, and 12 women (8.5%) and 101 men (19.3%) proposed  
122 articles. These show that men were more likely to respond and propose articles than were  
123 women.

124

### 125 *Proposed articles and voting differences*

126 The proportion of women co-authors on the articles proposed by men were on average  
127 lower (0.06 to 0.09; mean = 0.07) than those proposed by women (0.13 to 0.27; mean =  
128 0.20), although the data were highly skewed and most proposed articles (77%) had no  
129 women co-authors at all (Fig. 1a). When we examined the 100 top-ranked articles voted  
130 by women or men only, the bias remained: women voters ranked articles in the top 100  
131 that had more women co-authors (0.029 to 0.093 proportion women) than did those voted  
132 by men (0.001 to 0.029) (Fig. 1b).

133

134 However, even for women voters, there was a tendency to rank men-dominated articles  
135 more highly. For women voters only, there was a weak ( $\beta = 0.03$ ), but non-random ( $p_{\text{ran}} =$   
136 0.011) correlation between the proportion of women co-authors and the article's score  
137 (from the voting), such that the lower the proportion of women co-authors, the higher  
138 they were ranked by women (Fig. 2a). For men voters only, the relationship was stronger  
139 ( $\beta = 0.11$ ) and also non-random ( $p_{\text{ran}} < 0.0001$ ) (Fig. 2b). The inverse-score-weighted

140 mean proportion of women co-authors ( $\sum w_i/s_i =$  for  $i$  voters, where  $s$  = score from 1 to 4,  
141 and  $w$  = proportion of women co-authors) was 0.0277 for women voters, and 0.0251 for  
142 men voters (Fig. 2a,b).

143

#### 144 *Read-only articles*

145 These non-random relationships could be partially driven by the observation that older  
146 articles were more highly ranked than younger articles<sup>32</sup>, and that gender biases in  
147 authorship are generally stronger in older articles. So, we also used the ‘read-only’ article  
148 scores (in the original survey, voters were asked to indicate whether or not they had in  
149 fact read the paper they were scoring; for this new list, article score was unrelated to  
150 article age)<sup>32</sup> for women-only and men-only voters separately. Indeed, the relationships  
151 between article rank and proportion of women co-authors disappeared for both women  
152 voters (Fig. 2c) and men voters (Fig. 2d), although the inverse-score-weighted mean  
153 proportion of women authors was again higher for women voters (0.0458) than men  
154 voters (0.0303).

155

#### 156 *Lead author*

157 Examining just the gender of the lead author, 510 of the 544 papers (93.8%) proposed  
158 had a man as a first author. For the 100 top-ranked papers (read or not), 98 were led by a  
159 man; when men alone voted, 99 of the 100 top-ranked papers were led by a man, and  
160 when women voted, 96 were. As above, the difference between women and men voters  
161 largely disappeared when we examined the read-only list of the 100 top-ranked papers —  
162 when women voted, 93 of these was led by a man, and 92 were when men voted.

163

#### 164 *Temporal trends*

165 The articles proposed by the entire sample of ecologists indicated a general trend of  
166 increasing proportion of women co-authors, from < 5% women co-authors before the  
167 1990s, to the most recent articles published in the last decade exceeding one quarter  
168 women co-authorship (Fig. 3).

169

## 170 **Discussion**

171 Our results show that at least for well-established, expert ecologists, both men and  
172 women tend to propose and rank articles more highly when they are co-authored by more  
173 men, perhaps indicating a degree of homophily when assessing article importance. These  
174 results endure despite little evidence that men biologists view themselves as having  
175 relatively higher self-perceived expertise than women biologists (according to a sample  
176 of 61 men and 190 men tropical biologists)<sup>30</sup>. That article score and the proportion of  
177 women co-authors were correlated for both genders can be explained largely by the fact  
178 that older papers with which ecologists are at least familiar are generally ranked higher<sup>32</sup>.  
179 But because older articles had fewer women co-authors, women ecologists appear to have  
180 had little choice but to score the ‘classics’ more highly. Indeed, when we restricted the  
181 ranked articles to those that voting ecologists had actually read, the relationship  
182 disappeared.

183

184 We contend, however, that because assessing the read-only papers demonstrated less of a  
185 bias toward men-co-authored papers, this is in fact evidence of a lingering, subconscious

186 gender bias among ecologists. Both men and women ecologists rated articles that they  
187 had not actually read higher when they were more men-dominated, yet once they did  
188 personally evaluate (read) them, this bias disappeared. This appears to indicate that they  
189 had the *a priori* assumption that men-dominated papers would somehow be better. This  
190 assumption was stronger in men than women, but it seems that women ecologists are still  
191 subject to a persistent form of auto-sexism, perhaps kept flourishing by a remaining  
192 academic culture of valuing women's contributions less than men's.

193

194 This read-only group of younger articles (by 14 years, on average)<sup>32</sup>, combined with the  
195 observation that there is an increasing proportion of women co-authors on highly ranked  
196 ecology articles, are nonetheless encouraging signs. Indeed, that these highly ranked  
197 papers are now (over the last decade) exceeding 25% women co-authors agrees with the  
198 approximate overall pool of women co-authors in the general discipline (22.76% women  
199 co-authors for articles published from 1990-2011 in ecology and evolution, based on  
200 279012 total authorships)<sup>3</sup> (Fig. 3).

201

202 Despite this increasing trend, our results show that women ecologists are still very much  
203 in the minority, both in terms of high-ranking article authorships (i.e., less than one third)  
204 and editorships (i.e., less than one fifth). Further, women experts were much less likely to  
205 respond to requests to contribute their suggestions of potentially important articles. The  
206 underlying reasons for this are unclear, although we hypothesize that it could be  
207 explained in part by the observation that expert women ecologists are increasingly and  
208 disproportionately requested to take part in surveys, consortia, juries, and committees in  
209 an attempt to seek gender parity (e.g., reference<sup>20</sup>). Excessive requests to participate  
210 might be exasperating and time-consuming, thus discouraging participation rates relative  
211 to men.

212

213 Our results highlight two important remaining biases persisting among today's expert  
214 ecologists: (i) we all subconsciously bias our opinions of article importance toward those  
215 that have at least traditionally been dominated by men co-authors, and (ii) men ecologists  
216 are still more gender-biased than women ecologists in this regard. While homophily  
217 might partially explain these results, it seems apparent that some gender biases against  
218 women remain when ecologists assess article quality, and even more so when they judge  
219 apparent quality without actually reading the article (i.e., via reputation only). The  
220 potential solutions to these problems are varied, including increasing the discussion of the  
221 contribution of women ecologists more explicitly in university teaching material<sup>9</sup>,  
222 improving flexibility and opportunity in the workplace<sup>2,33</sup> and at conferences<sup>2,34</sup> for  
223 women, embracing positive discrimination in academic appointments<sup>33</sup>, increasing the  
224 prevalence of double-blind reviews<sup>16</sup>, and advocating alternative metrics of citation  
225 performance that do not disadvantage women<sup>19</sup>. We further add that all ecologists —  
226 especially men — would benefit from serious, personal introspection about their own  
227 biases<sup>35</sup>, no matter how uncomfortable an admission of gender bias might be. Denial of  
228 one's own contribution to the problem only serves to perpetuate it<sup>33</sup>. Consciously  
229 increasing the number of women ecologists among our students, in our labs, on our  
230 editorial boards, requested to review papers, and as co-authors on our manuscripts

231 (something we admittedly failed to do here), will also help to reduce these subconscious  
232 biases.

233

## 234 **Methods**

235 The full details of how we generated the list of most recommended ecology articles and  
236 how they were ranked are given in Courchamp & Bradshaw<sup>32</sup>; however, we briefly  
237 describe the approach and main characteristics of the list here. We contacted the editorial  
238 members (*ipso facto*, ecology ‘experts’) of some of the most renowned journals in  
239 general ecology: *Ecology Letters*, *Trends in Ecology and Evolution*, *Ecology*, *Oikos*, *The*  
240 *American Naturalist*, *Ecology and Evolution* and *Ecography*, as well as all the members  
241 of the *Faculty of 1000 Ecology Section* ([f1000.com/prime/thefaculty/ecol](http://f1000.com/prime/thefaculty/ecol)). Of these, we  
242 contacted 665 by e-mail to ask them to send us three to five peer-reviewed papers (or  
243 more if they wished) that they deemed each postgraduate student in ecology — regardless  
244 of their particular topic — should read by the time they finish their dissertation, and that  
245 any ecologist should also probably read.

246

247 We successfully elicited 147 respondents of the 665 we contacted, who in total  
248 nominated 544 different articles to include in the primary list. We then asked these same  
249 665 experts to vote on each of the papers to obtain a ranking, assigning each article to one  
250 of four categories: *Top 10*, *Between 11-25*, *Between 26-100* or *Not in the top "100"*. We  
251 gave one (1) point for each selection of the *Top 10* category, two points for the *Between*  
252 *11-25*, three points for the *Between 26-100*, and four points for the *Not in the top "100"*.  
253 As described in Courchamp & Bradshaw<sup>32</sup>, we averaged all article scores across all  
254 randomly sampled sets of votes for each article, and then applied a simple rank to these  
255 (ties averaged), thus avoiding any contrived magnitude of the differences between  
256 arbitrary score values (i.e., 1 to 4 base scores). The lowest scores therefore indicate the  
257 highest ranks.

258

259 We manually classified the gender of all proposers, voters, and article co-authors by  
260 searching the internet, requesting confirmation from colleagues, or from personal  
261 knowledge. We searched meticulously and are confident that we have a correct gender  
262 assignment for all people included in the analysis. The Ethics Committee  
263 of the *Centre National de Recherche Scientifique* (CNRS, employer of FC) deemed that  
264 no ethics approval was necessary for the voluntary and anonymous survey that generated  
265 the ranked list of articles.

266

## 267 **Analyses**

268 We took those articles proposed by either women only, or men only, to examine trends  
269 between the proposer genders (74% of all proposed papers were proposed only once)<sup>36</sup>.  
270 For determining trends between genders of the voters, we subset the entire dataset for  
271 women- and men-only voters, tabulating the proportion of women co-authors and the  
272 gender of lead authors for the different top-100 ranks resulting from each gender-specific  
273 voter subset.

274

275 To test for correlations between rankings and gender, we used the proportion of female  
276 co-authors for each article as the response variable in all analyses. We also used the same

277 resampling approach in reference<sup>32</sup> to determine correlations by taking the raw, average  
278 scores for each article (independent variable) and compared them to randomised orders of  
279 the corresponding correlate (dependent variable) for each test. For each randomised order  
280 over 10,000 iterations, we calculated a root mean-squared error (RMSE<sub>random</sub>) and  
281 compared this to the observed RMSE between the two variables. When the probability  
282 that randomisations produced RMSE ≤ observed RMSE was small (i.e., number of times  
283 [RMSE<sub>random</sub> ≤ RMSE<sub>observed</sub>] ÷ 10,000 iterations << 0.05), we concluded that there was  
284 evidence of a correlation.

285

## 286 **Data availability**

287 All code and data for the analysis are available online at  
288 [github.com/cjabradshaw/HIPE/gender/](https://github.com/cjabradshaw/HIPE/gender/)

289

## 290 **Acknowledgements**

291 We thank the many participating editorial members, as well as to C. Albert and G. M.  
292 Luque for help with the survey and article management. FC was supported by BNP-  
293 Paribas and ANR grants, and CJAB was supported by BNP-Paris and Australian  
294 Research Council grants.

295

## 296 **Author contributions**

297 CJAB and FC conceived and designed the study, and FC collected the data. CJAB did the  
298 analyses and wrote the original draft of the manuscript, and CJAB and FC reviewed and  
299 edited the manuscript.

300

## 301 **References**

- 302 1. Zakaib, G. D. Science gender gap probed. *Nature* **470**, 153, doi:10.1038/470153a (2011).
- 303 2. Ceci, S. J. & Williams, W. M. Understanding current causes of women's underrepresentation in  
304 science. *Proc. Natl. Acad. Sci. USA* **108**, 3157-3162 (2011).
- 305 3. West, J. D., Jacquet, J., King, M. M., Correll, S. J. & Bergstrom, C. T. The role of gender in scholarly  
306 authorship. *PLoS One* **8**, e66212, doi:10.1371/journal.pone.0066212 (2013).
- 307 4. Knobloch-Westerwick, S., Glynn, C. J. & Huge, M. The Matilda Effect in science communication.  
308 *Sci. Comm.* **35**, 603-625, doi:10.1177/1075547012472684 (2013).
- 309 5. Moss-Racusin, C. A., Dovidio, J. F., Brescoll, V. L., Graham, M. J. & Handelsman, J. Science  
310 faculty's subtle gender biases favor male students. *Proc. Natl. Acad. Sci. USA* **109**, 16474-16479  
311 (2012).
- 312 6. Aldercotte, A., Guyan, K., Lawson, J., Neave, S. & Altorjai, S. ASSET 2016: experiences of gender  
313 equality in STEMM academia and their intersections with ethnicity, sexual orientation, disability and  
314 age. (Equality Challenge Unit, London, United Kingdom, 2017).
- 315 7. Buckley, L. M., Sanders, K., Shih, M., Kallar, S. & Hampton, C. Obstacles to promotion? Values of  
316 women faculty about career success and recognition. *Academ. Med.* **75**, 283-288 (2000).
- 317 8. Ceci, S. J., Ginther, D. K., Kahn, S. & Williams, W. M. Women in academic science. *Psychol. Sci.*  
318 *Publ. Int.* **15**, 75-141, doi:10.1177/1529100614541236 (2014).
- 319 9. Damschen, E. I. *et al.* Visibility matters: increasing knowledge of women's contributions to ecology.  
320 *Front. Ecol. Environ.* **3**, 212-219, doi:10.1890/1540-9295(2005)003[0212:VMIKOW]2.0.CO;2  
321 (2005).
- 322 10. Tregenza, T. Gender bias in the refereeing process? *Trends Ecol. Evol.* **17**, 349-350,  
323 doi:[http://dx.doi.org/10.1016/S0169-5347\(02\)02545-4](http://dx.doi.org/10.1016/S0169-5347(02)02545-4) (2002).
- 324 11. Helmer, M., Schottdorf, M., Neef, A. & Battaglia, D. Gender bias in scholarly peer review. *eLife* **6**,  
325 e21718, doi:10.7554/eLife.21718 (2017).

- 326 12. Fox, C. W., Burns, C. S. & Meyer, J. A. Editor and reviewer gender influence the peer review process  
327 but not peer review outcomes at an ecology journal. *Funct. Ecol.* **30**, 140-153, doi:10.1111/1365-  
328 2435.12529 (2016).
- 329 13. Grod, O. N. *et al.* Systematic variation in reviewer practice according to country and gender in the  
330 field of ecology and evolution. *PLoS One* **3**, e3202, doi:10.1371/journal.pone.0003202 (2008).
- 331 14. Buckley, H. L., Sciligo, A. R., Adair, K. L., Case, B. S. & Monks, J. M. Is there gender bias in  
332 reviewer selection and publication success rates for the New Zealand Journal of Ecology? *N. Z. J.*  
333 *Ecol.* **38**, 335-339 (2014).
- 334 15. Borsuk, R. M., Budden, A. E., Leimu, R., Aarssen, L. W. & Lortie, C. J. The influence of author  
335 gender, national language and number of authors on citation rate in ecology. *Open Ecol. J.* **2**, 25-28,  
336 doi:10.2174/1874213000902010025 (2009).
- 337 16. Budden, A. E. *et al.* Double-blind review favours increased representation of female authors. *Trends*  
338 *Ecol. Evol.* **23**, 4-6, doi:http://dx.doi.org/10.1016/j.tree.2007.07.008 (2008).
- 339 17. Kelly, C. D. & Jennions, M. D. The h index and career assessment by numbers. *Trends Ecol. Evol.* **21**,  
340 167-170, doi:http://dx.doi.org/10.1016/j.tree.2006.01.005 (2006).
- 341 18. Leimu, R. & Koricheva, J. What determines the citation frequency of ecological papers? *Trends Ecol.*  
342 *Evol.* **20**, 28-32, doi:http://dx.doi.org/10.1016/j.tree.2004.10.010 (2005).
- 343 19. Symonds, M. R. E., Gemmell, N. J., Braisher, T. L., Gorringer, K. L. & Elgar, M. A. Gender  
344 differences in publication output: towards an unbiased metric of research performance. *PLoS One* **1**,  
345 e127, doi:10.1371/journal.pone.0000127 (2006).
- 346 20. Laurance, W. F., Carolina Useche, D., Laurance, S. G. & Bradshaw, C. J. A. Predicting publication  
347 success for biologists. *BioScience* **63**, 817-823, doi:10.1525/bio.2013.63.10.9 (2013).
- 348 21. Monosson, E. (Cornell University Press, Cornell, New York, 2008).
- 349 22. McGuire, K. L., Primack, R. B. & Losos, E. C. Dramatic improvements and persistent challenges for  
350 women ecologists. *BioScience* **62**, 189-196, doi:10.1525/bio.2012.62.2.12 (2012).
- 351 23. O'Brien, K. R. & Hapgood, K. P. The academic jungle: ecosystem modelling reveals why women are  
352 driven out of research. *Oikos* **121**, 999-1004 (2012).
- 353 24. Moss-Racusin, C. A. & Rudman, L. A. Disruptions in women's self-promotion: the backlash  
354 avoidance model. *Psychol. Women Quart.* **34**, 186-202 (2010).
- 355 25. Wade, M. E. Women and salary negotiation: the costs of self-advocacy. *Psychol. Women Quart.* **25**,  
356 65-76, doi:10.1111/1471-6402.00008 (2001).
- 357 26. Rudman, L. A. Self-promotion as a risk factor for women: the costs and benefits of  
358 counterstereotypical impression management. *J. Person. Soc. Psychol.* **74**, 629-645,  
359 doi:10.1037/0022-3514.74.3.629 (1998).
- 360 27. Lincoln, A. E., Pincus, S., Koster, J. B. & Leboy, P. S. The Matilda Effect in science: awards and  
361 prizes in the US, 1990s and 2000s. *Soc. Stud. Sci.* **42**, 307-320, doi:10.1177/0306312711435830  
362 (2012).
- 363 28. Bornmann, L., Mutz, R. & Daniel, H.-D. Gender differences in grant peer review: a meta-analysis. *J.*  
364 *Informetr.* **1**, 226-238, doi:http://dx.doi.org/10.1016/j.joi.2007.03.001 (2007).
- 365 29. Wenneras, C. & Wold, A. Nepotism and sexism in peer-review. *Nature* **387**, 341-343 (1997).
- 366 30. Laurance, W. F., Laurance, S. G. & Useche, D. C. Gender differences in science: no support for the  
367 'Homer Simpson Effect' among tropical researchers. *Trends Ecol. Evol.* **26**, 262-263,  
368 doi:http://dx.doi.org/10.1016/j.tree.2011.03.010 (2011).
- 369 31. Nature. Women feel isolated. *Nature* **474**, 409, doi:10.1038/nj7351-409c (2011).
- 370 32. Courchamp, F. & Bradshaw, C. J. A. 100 articles every ecologist should read. *Nat. Ecol. Evol.*,  
371 doi:10.1038/s41559-017-0370-9 (2017).
- 372 33. Barres, B. A. Does gender matter? *Nature* **442**, 133-136 (2006).
- 373 34. Sardelis, S. & Drew, J. A. Not "pulling up the ladder": women who organize conference symposia  
374 provide greater opportunities for women to speak at conservation conferences. *PLoS One* **11**,  
375 e0160015, doi:10.1371/journal.pone.0160015 (2016).
- 376 35. Bradshaw, C. J. A. *The Effective Scientist. A Handy Guide to an Academic Career.* (Cambridge  
377 University Press, 2018).
- 378 36. Courchamp, F. & Bradshaw, C. J. A. 100 articles every ecologist should read. *Nat. Ecol. Evol.* **in**  
379 **press** (2017).
- 380 37. Darwin, C. R. & Wallace, A. R. On the tendency of species to form varieties; and on the perpetuation  
381 of varieties and species by natural means of selection. *J. Proc. Linn. Soc. Lond. Zool.* **3**, 45-62 (1858).





**Figure 1.** **a)** Mean (dashed horizontal lines) and 95% confidence interval (error bars) of the proportion of women co-authors for the proposed articles relative to the gender of the proposer (articles proposed by 68 women only, and 418 proposed by men only). The values (proportion women co-authors) are ‘scattered’ to show their distribution within each proposer gender; note that 55.9% and 80.1% of the articles proposed by women only and men only, respectively, had no women co-authors (i.e., zero values). **b)** Mean (dashed horizontal lines) and 95% confidence interval (error bars) of the proportion of women co-authors of the 100 top-ranked articles relative to the gender of the voter (62 women and 292 men voted in total). The values (proportion women co-authors) are ‘scattered’ to show their distribution within each voter gender; note that 83% and 94% of the articles proposed by women and men, respectively had no women co-authors (i.e., zero values).

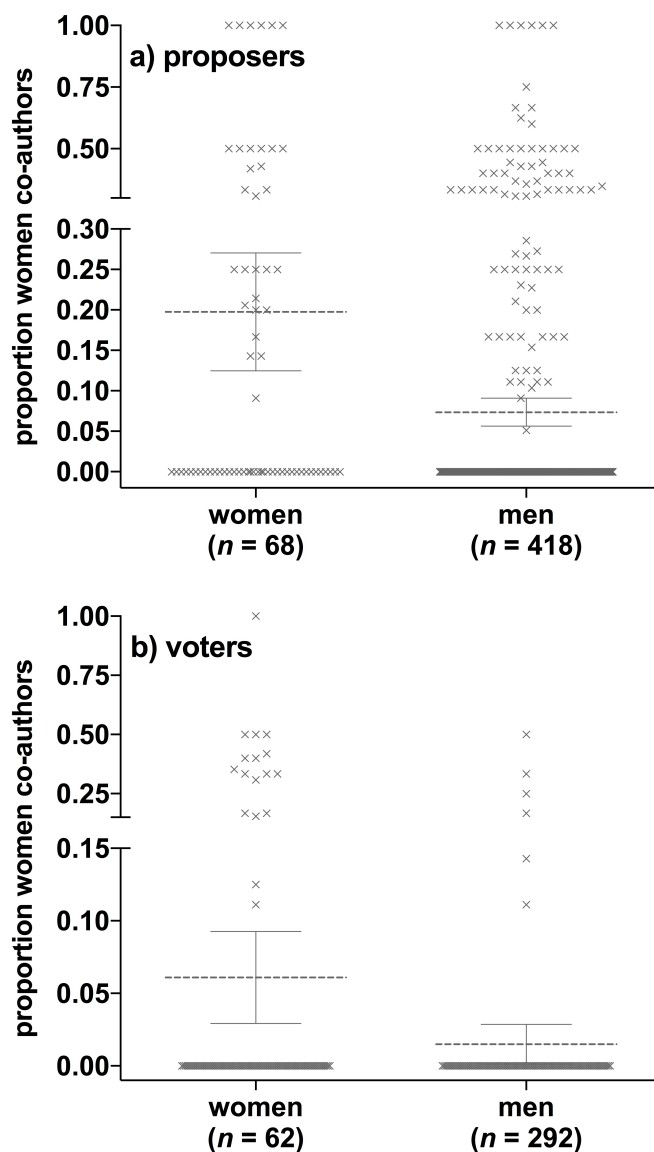

**Figure 2.** **a)** Proportion of women co-authors on articles relative to their mean rank (score; where lower scores indicate a higher ranking) when voters were restricted to women. There was a weak ( $\beta = 0.03$ ), but non-random ( $p_{\text{ran}} = 0.011$ ) correlation between article gender ratio and score, such that the lower the proportion of women co-authors, the higher they were ranked by women. **b)** Proportion of women co-authors on articles relative to their mean rank when voters were restricted to men. There was a stronger ( $\beta = 0.11$ ) and non-random ( $p_{\text{ran}} < 0.0001$ ) correlation between article gender ratio and score, such that the lower the proportion of women co-authors, the higher they were ranked by men. Also shown in both panels is the inverse-score-weighted mean proportion of women co-authors ( $\sum w_i/s_i = 0.0277$  for  $i$  women voters, or  $0.0251$  for  $i$  men voters, where  $s =$  score from 1 to 4, and  $w =$  proportion of women co-authors). **c)** As in **a**, but when the scored articles were only those actually read by the voters<sup>32</sup>. **d)** As in **b**, but when the scored articles were only those actually read by the voters. The inverse-score-weighted mean proportion of women co-authors for these read-only articles was higher for women-only ( $0.0458$ ) versus men-only voters ( $0.0303$ ).

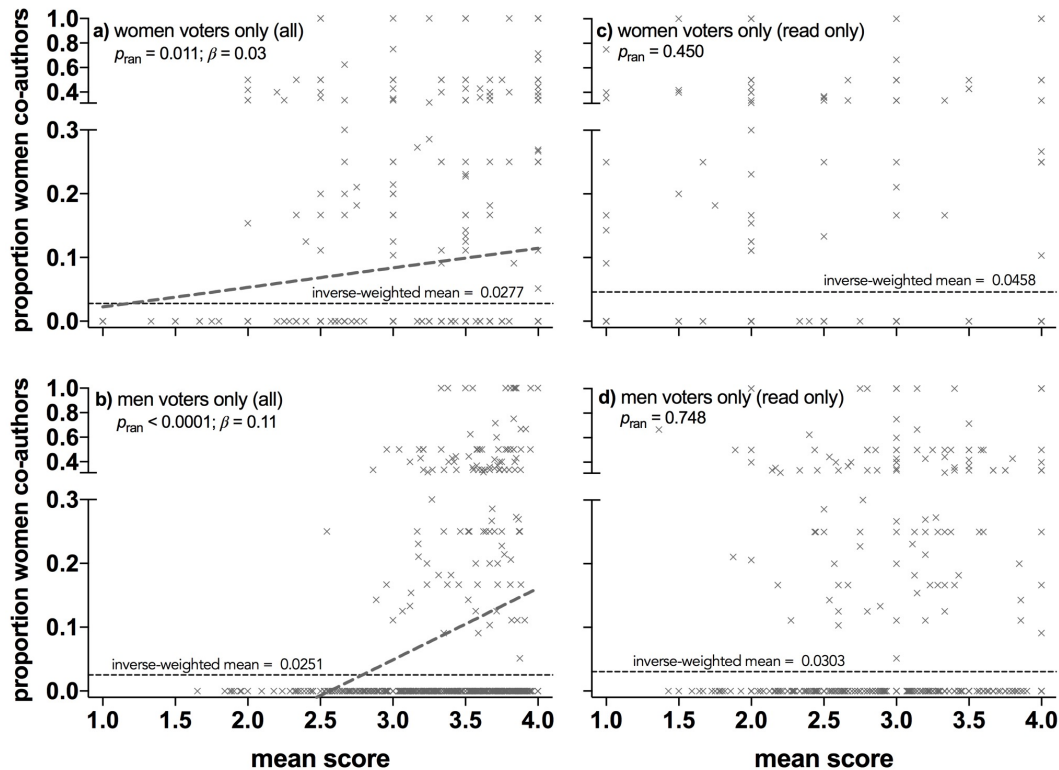

**Figure 3.** Time series of mean ( $\pm 2$  standard errors of the mean; grey dashed lines) decadal gender ratio (proportion women co-authors) for all 544 proposed articles. Numbers above the graph indicate sample size (number of articles) used to calculate decadal means (' $\leftarrow 1$ ' indicates one article from 1858)<sup>37</sup>. For comparison, the proportion of women authorships in articles published from 1990-2011 in ecology and evolution (22.76% of 279012 total authorships; lower black horizontal dashed line)<sup>3</sup>, are shown. Also shown are the 95% confidence limits of the proportion of women co-authors of the 100 top-ranked articles assessed by women (green shaded area: 0.029 to 0.093; Fig. 1b) and men voters (orange-shaded area: 0.001 to 0.029; Fig. 1b).

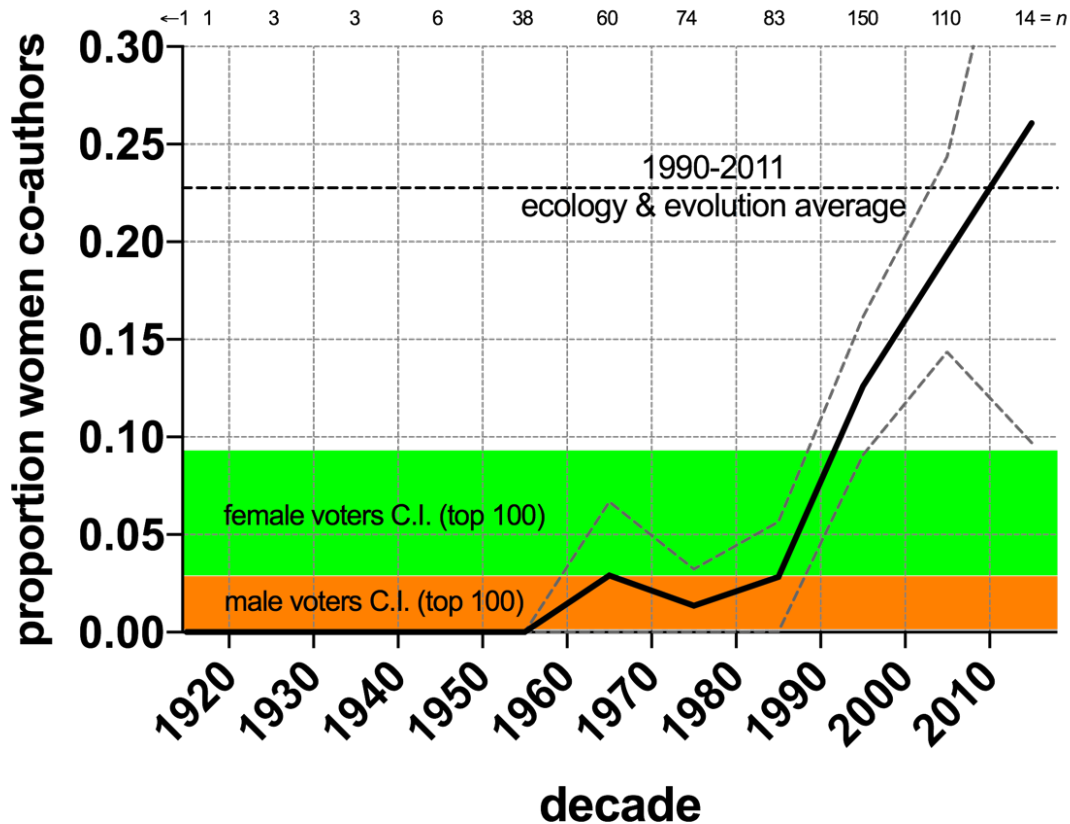

Source: http://biorxiv.org/content/10.1101/219824v2.full.pdf
